# Supplementary material for: Circumventing AKT-Associated Radioresistance in Oral Cancer by Novel Nanoparticle-Encapsulated Capivasertib
Source: MDPI journal article supplement (doi:10.3390/cells9030533), 2020-02-25
Supplement: s1 [file s1]

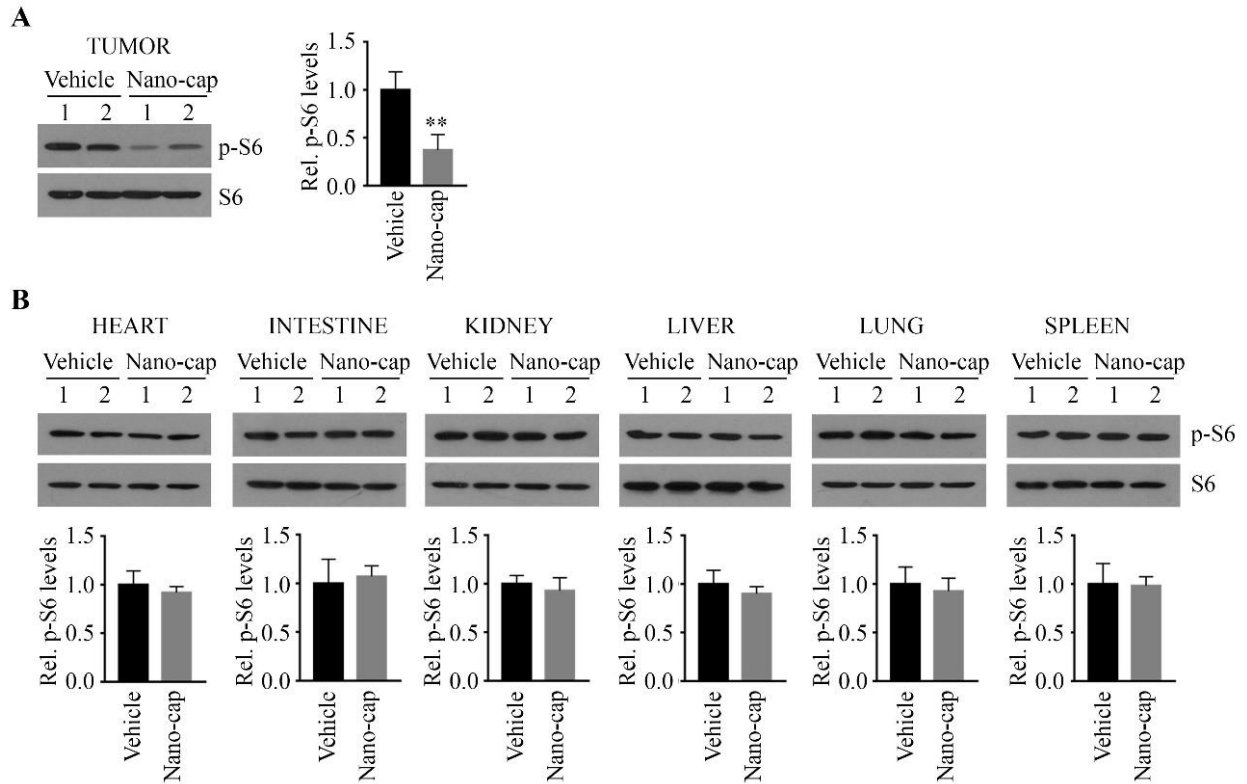

**Supplementary Figure 1:** Representative Western blotting results and quantitative data (n=6) showing the changes in p-S6 levels in tumor xenografts (A) and major mouse organs (B), respectively. 1 and 2 represent the testing samples from two different mice in the same treatment group. \*\*p < 0.01.
